# Supplementary material for: An environmentally-benign NaNbO3 based perovskite antiferroelectric alternative to traditional lead-based counterparts
Source: Royal Society of Chemistry journal article supplement (doi:10.1039/c9tc05672f), 2019-01-01
Supplement: c9tc05672f1.pdf [file c9tc05672f1.pdf]

## Supplementary Information

### **Environmentally-benign NaNbO<sub>3</sub> based perovskite antiferroelectric alternative to traditional lead-based counterpart**

Aiwen Xie<sup>a</sup>, He Qi<sup>a</sup>, Ruzhong Zuo<sup>\*a</sup>, Ao Tian<sup>a</sup>, Jun Chen<sup>a</sup> and Shujun Zhang<sup>\*b</sup>

<sup>a</sup>Institute of Electro Ceramics & Devices, School of Materials Science and Engineering, Hefei  
University of Technology, Hefei, 230009, P.R. China

<sup>b</sup>Institute for Superconducting and Electronic Materials, Australian Institute of Innovative  
Materials, University of Wollongong, NSW 2500, Australia

\*Correspondence to: [piezolab@hfut.edu.cn](mailto:piezolab@hfut.edu.cn) (R.Z. Zuo), [shujun@uow.edu.au](mailto:shujun@uow.edu.au) (S.J. Zhang)

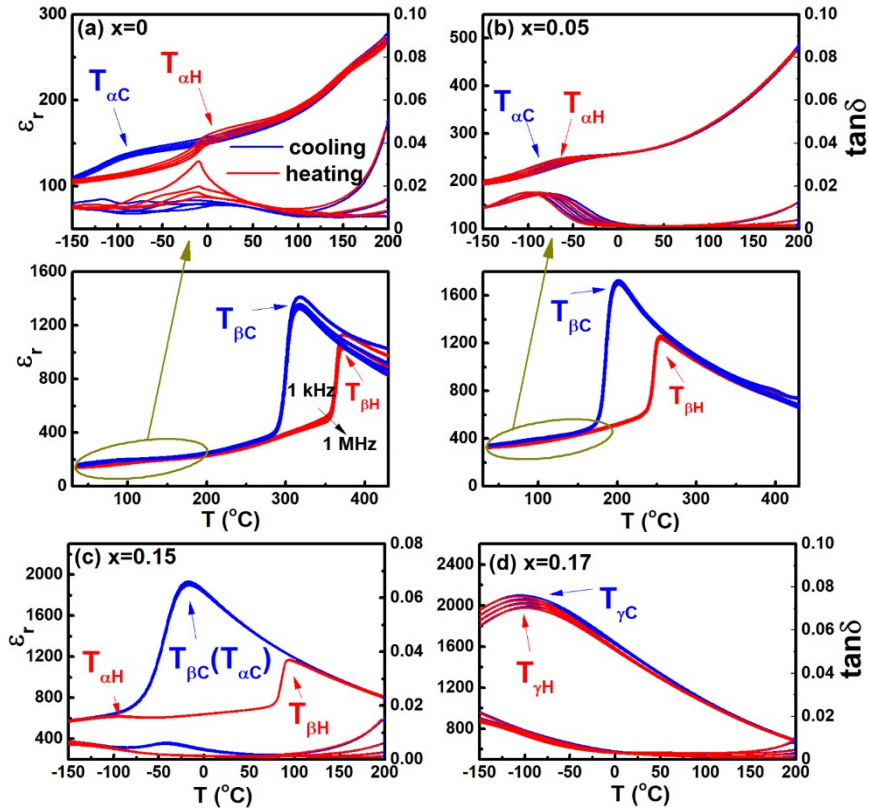

**Fig. S1.** The dielectric permittivity ( $\epsilon_r$ ) and dielectric loss ( $\tan\delta$ ) as a function of temperature measured on heating and cooling cycles for  $(1-x)\text{NN}-x\text{ST}$  ceramics: (a)  $x=0$ , (b)  $x=0.05$ , (c)  $x=0.15$  and (d)  $x=0.17$ .

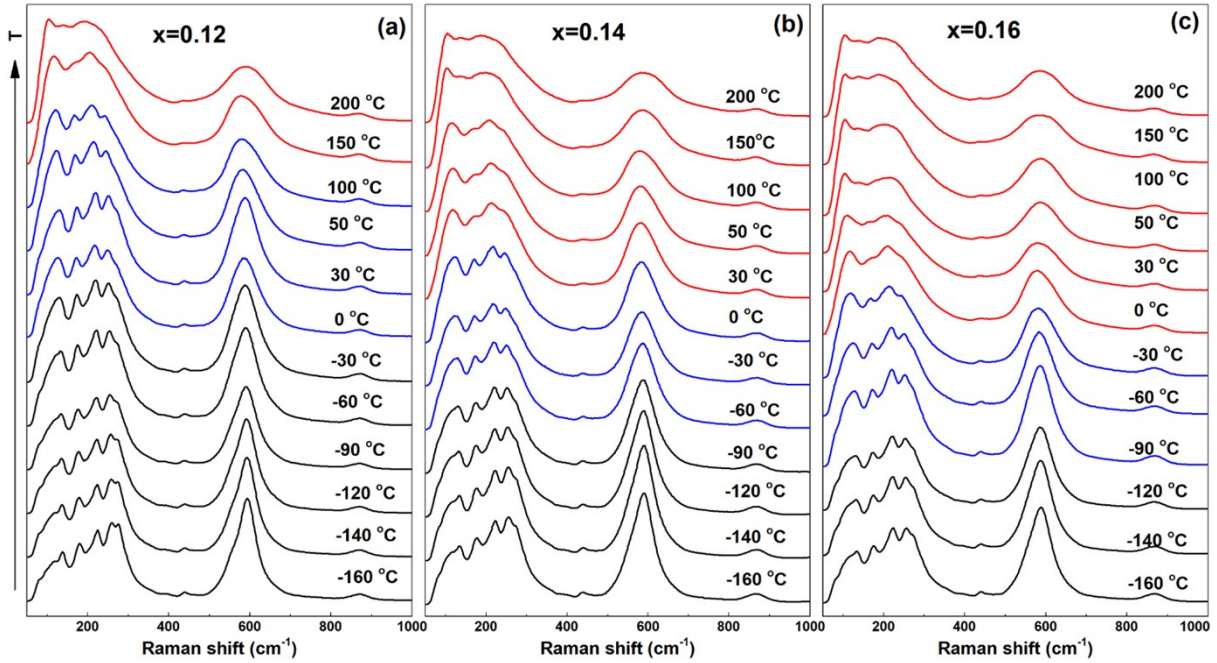

**Fig. S2.** Raman spectra for  $(1-x)\text{NN}-x\text{ST}$  ceramics at various temperatures: (a)  $x=0.12$ , (b)  $x=0.14$  and (c)  $x=0.16$ .

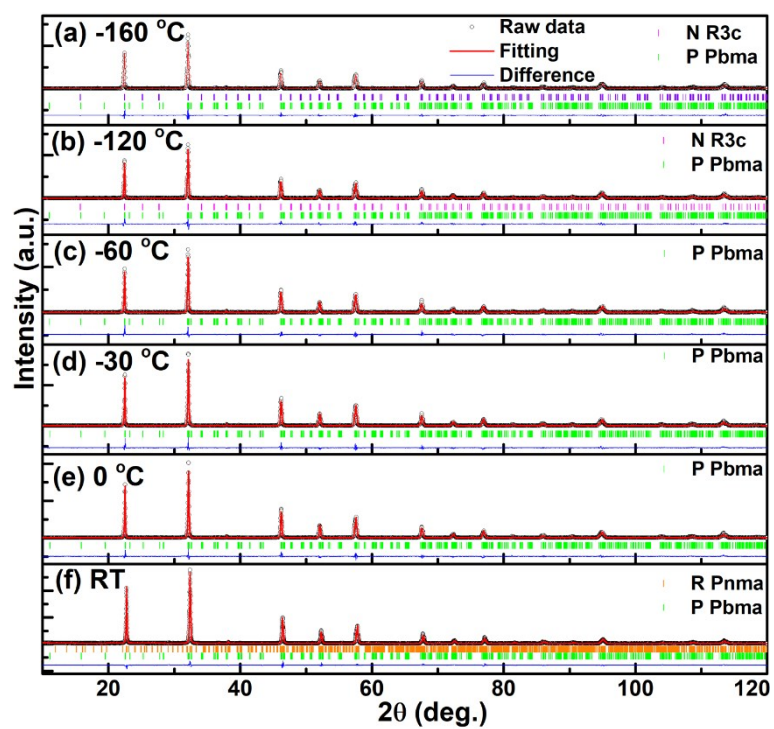

**Fig. S3.** Rietveld refinement plots of the  $x=0.14$  ceramic measured at different temperatures.

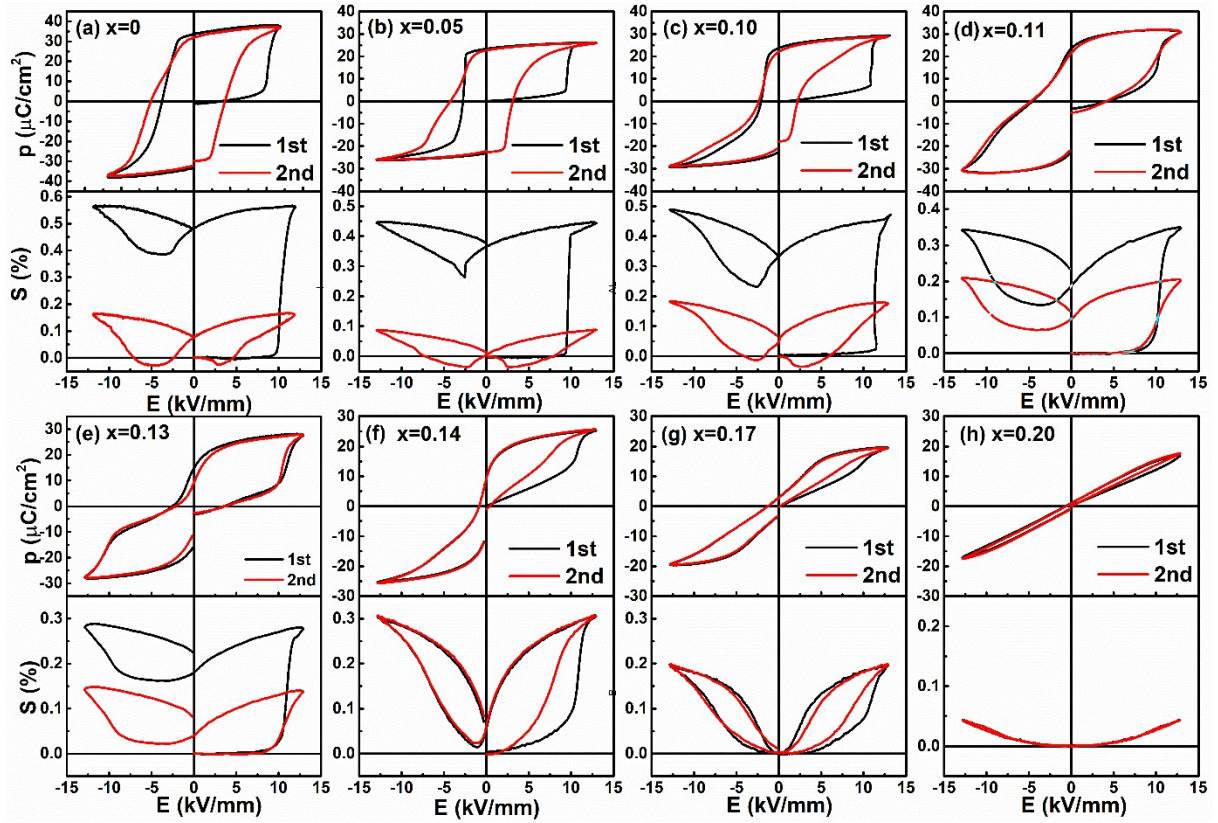

**Fig. S4.** Room-temperature P-E loops and bipolar S-E curves of the (1-x)NN-xST ceramic during different electric field cycles at 10 Hz: (a)  $x=0$ , (b)  $x=0.05$ , (c)  $x=0.1$ , (d)  $x=0.11$ , (e)  $x=0.13$ , (f)  $x=0.14$ , (g)  $x=0.17$  and (h)  $x=0.2$ .

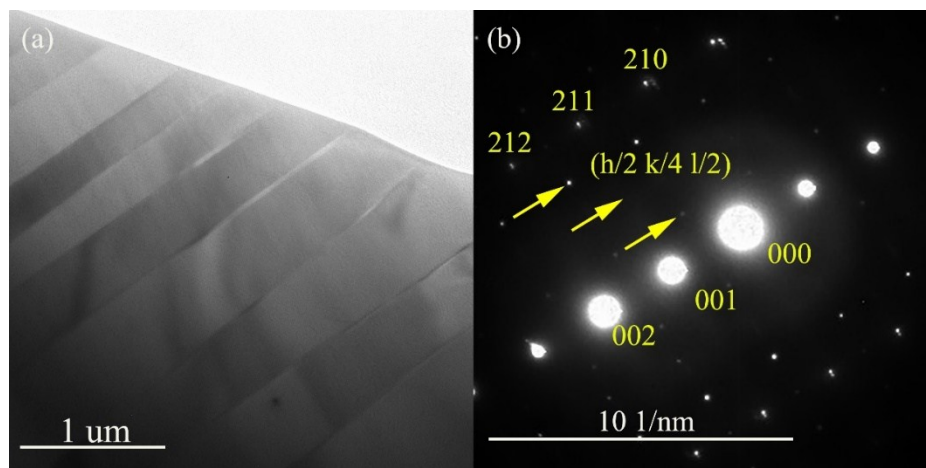

**Fig. S5.** (a) Bright-field TEM image and (b) the SAED patterns of the  $x=0.12$  ceramic.

**Table S1.** Refined structure parameters by the Rietveld method for x=0.14 ceramic as function of temperature.

| T (°C) | Space group | Fraction (%) | Lattice parameters                                      | V (Å <sup>3</sup> ) | R <sub>wp</sub> (%) | R <sub>p</sub> (%) | χ <sup>2</sup> |
|--------|-------------|--------------|---------------------------------------------------------|---------------------|---------------------|--------------------|----------------|
| -160   | <i>R3c</i>  | 54.2         | a=b=c=7.8117(1) Å, α=β=γ=90.102(5)°                     | 476.698(11)         | 9.41                | 7.55               | 1.78           |
|        | <i>Pbma</i> | 45.8         | a=5.5432(2) Å, b=15.5951(7) Å, c=5.5094(2) Å, α=β=γ=90° | 476.284(35)         |                     |                    |                |
| -120   | <i>R3c</i>  | 21.2         | a=b=c=7.8129(5) Å, α=β=γ=90.057(8)°                     | 476.914(21)         | 9.33                | 6.95               | 1.86           |
|        | <i>Pbma</i> | 78.8         | a=5.5438(2) Å, b=15.5963(7) Å, c=5.5091(2) Å, α=β=γ=90° | 476.340(36)         |                     |                    |                |
| -60    | <i>Pbma</i> | 100          | a=5.5430(2) Å, b=15.6023(7) Å, c=5.5123(2) Å, α=β=γ=90° | 476.726(36)         | 8.88                | 6.72               | 1.70           |
| -30    | <i>Pbma</i> | 100          | a=5.5441(2) Å, b=15.6147(6) Å, c=5.5160(2) Å, α=β=γ=90° | 477.521(33)         | 8.29                | 7.09               | 1.68           |
| 0      | <i>Pbma</i> | 100          | a=5.5446(1) Å, b=15.6233(7) Å, c=5.5180(1) Å, α=β=γ=90° | 478.010(34)         | 8.73                | 6.90               | 1.74           |
| RT     | <i>Pbma</i> | 11.5         | a=5.5524(1) Å, b=15.6263(2) Å, c=5.5189(1) Å, α=β=γ=90° | 478.840(21)         | 8.92                | 6.91               | 1.61           |
|        | <i>Pnma</i> | 88.5         | a=7.8354(2) Å, b=7.8193(3) Å, c=23.444(9) Å, α=β=γ=90°  | 1436.398(44)        |                     |                    |                |

RT : room temperature

**Table S2.** Refined structural parameters of the (1-x)NN-xST ceramic powders at room temperature.

| x    | State         | Space group             | Fraction (%) | Lattice parameters                                                  | V (Å <sup>3</sup> ) | R <sub>wp</sub> (%) | R <sub>p</sub> (%) | χ <sup>2</sup> |
|------|---------------|-------------------------|--------------|---------------------------------------------------------------------|---------------------|---------------------|--------------------|----------------|
| 0    | <i>Virgin</i> | <i>Pbma</i>             | 86.7         | a=5.5653(3) Å, b=15.5550(4) Å, c=5.5024(3) Å, α=β=γ=90°             | 475.315(9)          | 8.87                | 6.43               | 2.09           |
|      |               | <i>P2<sub>1</sub>ma</i> | 13.3         | a=5.5712(2) Å, b=7.7802(3) Å, c=5.5016(3) Å, α=β=γ=90°              | 238.472(7)          |                     |                    |                |
| 0.05 | <i>Virgin</i> | <i>Pbma</i>             | 91.1         | a=5.5608(1) Å, b=15.5802(2) Å, c=5.5101(1) Å, α=β=γ=90°             | 477.383(12)         | 9.33                | 7.28               | 2.22           |
|      |               | <i>P2<sub>1</sub>ma</i> | 9.9          | a=5.5780(2) Å, b=7.7815(3) Å, c=5.5049(4) Å, α=β=γ=90°              | 238.945(9)          |                     |                    |                |
| 0.10 | <i>Virgin</i> | <i>Pbma</i>             | 96.2         | a=5.5547(1) Å, b=15.6121(2) Å, c=5.5144(1) Å, α=β=γ=90°             | 478.210(13)         | 9.22                | 7.66               | 2.11           |
|      |               | <i>P2<sub>1</sub>ma</i> | 3.8          | a=5.5808(1) Å, b=7.8021(5) Å, c=5.5118(4) Å, α=β=γ=90°              | 239.997(8)          |                     |                    |                |
| 0.11 | <i>Virgin</i> | <i>Pbma</i>             | 100          | a=5.5513(1) Å, b=15.6255(2) Å, c=5.5164(1) Å, α=β=γ=90°             | 478.498(12)         | 9.12                | 7.87               | 2.09           |
| 0.12 | <i>Virgin</i> | <i>Pbma</i>             | 100          | a=5.5521(1) Å, b=15.6261(1) Å, c=5.5170(1) Å, α=β=γ=90°             | 478.645(9)          | 8.30                | 6.46               | 1.76           |
| 0.13 | <i>Virgin</i> | <i>Pbma</i>             | 100          | a=5.5526(1) Å, b=15.6265(2) Å, c=5.5185(1) Å, α=β=γ=90°             | 478.826(11)         | 9.07                | 6.95               | 2.03           |
| 0.14 | <i>Virgin</i> | <i>Pbma</i>             | 11.5         | a=5.5524(1) Å, b=15.6263(2) Å, c=5.5189(1) Å, α=β=γ=90°             | 478.840(21)         | 8.92                | 6.91               | 1.61           |
|      |               | <i>Pnma</i>             | 88.5         | a=7.8354(2) Å, b=7.8193(3) Å, c=23.444(9) Å, α=β=γ=90°              | 1436.398(44)        |                     |                    |                |
| 0.15 | <i>Virgin</i> | <i>Pbma</i>             | 4.0          | a=5.5534(3) Å, b=15.6282(4) Å, c=5.5190(4) Å, α=β=γ=90°             | 478.998(34)         | 9.63                | 7.35               | 2.41           |
|      |               | <i>Pnma</i>             | 96.0         | a=7.8183(1) Å, b=7.8265(1) Å, c=23.4923(8) Å, α=β=γ=90°             | 1437.486(53)        |                     |                    |                |
| 0.16 | <i>Virgin</i> | <i>Pnma</i>             | 100          | a=7.8179(3) Å, b=7.8252(1) Å, c=23.5123(9) Å, α=β=γ=90°             | 1438.397(42)        | 9.52                | 7.34               | 2.30           |
| 0.17 | <i>Virgin</i> | <i>Pnma</i>             | 100          | a=7.8290(2) Å, b=7.8289(3) Å, c=23.4790(5) Å, α=β=γ=90°             | 1439.082(52)        | 9.60                | 7.41               | 2.21           |
| 0.20 | <i>Virgin</i> | <i>Pnma</i>             | 100          | a=7.8422(1) Å, b=7.8327(1) Å, c=23.4814(3) Å, α=β=γ=90°             | 1442.354(27)        | 9.04                | 7.02               | 1.43           |
| 0.12 | <i>Poled</i>  | <i>P2<sub>1</sub></i>   | 100          | a=5.5517(1) Å, b=15.6266(1) Å, c=5.5178(1) Å, α=γ=90°, β=90.048(1)° | 478.705(11)         | 9.16                | 6.88               | 1.88           |
| 0.16 | <i>Poled</i>  | <i>Pnma</i>             | 100          | a=7.8171(2) Å, b=7.8259(1) Å, c=23.5120(8) Å, α=β=γ=90°             | 1438.383(38)        | 9.06                | 7.00               | 2.27           |
